# Supplementary material for: Digestive and appendicular soft-parts, with behavioural implications, in a large Ordovician trilobite from the Fezouata Lagerstätte, Morocco
Source: PubMed Central journal article supplement (PMC5223178; doi:10.1038/srep39728), 2017-01-10
Supplement: srep39728-s1.pdf [file srep39728-s1.pdf]

**Digestive and appendicular soft-parts, with behavioural implications, in a large Ordovician trilobite from the Fezouata Lagerstätte, Morocco**

Juan C. Gutiérrez-Marco, Diego C. García-Bellido, Isabel Rábano & Artur A. Sá

**SUPPLEMENTARY FIGURES 1–3**

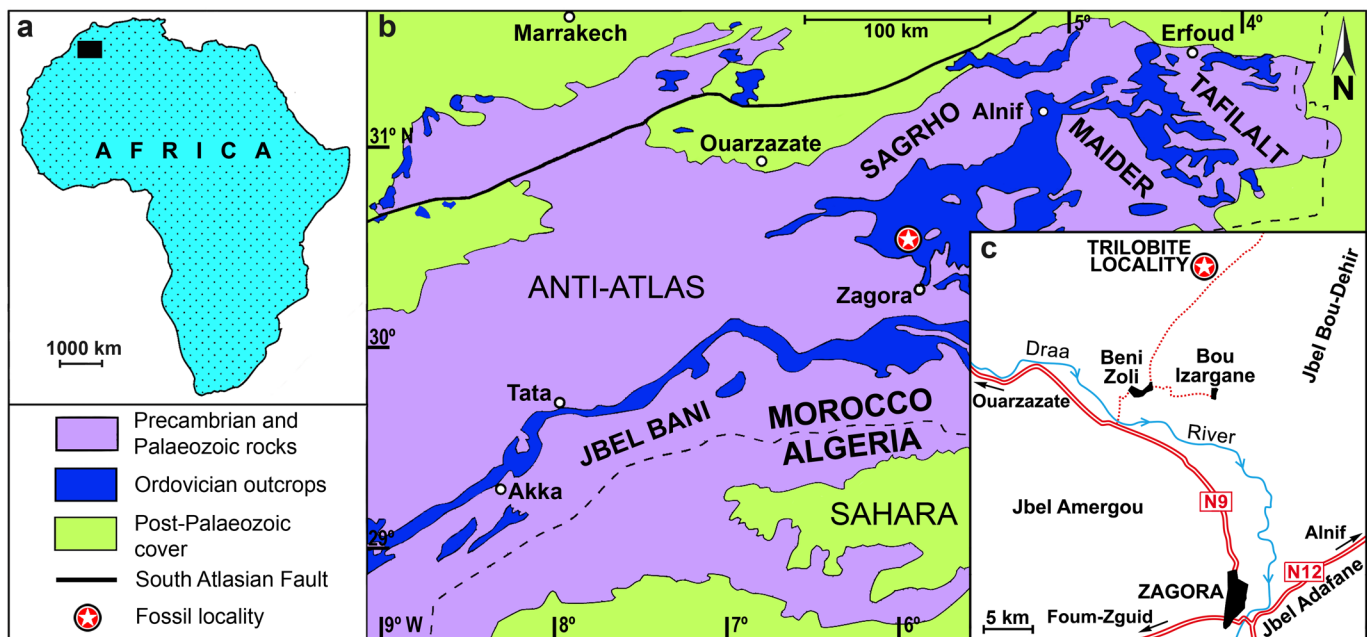

**Supplementary Figure 1. Fossil locality.** (a) Map indicating the position of the studied region in Africa. (b) Geological sketch map of the central and eastern Anti-Atlas of Morocco, with indication of Ordovician outcrops and the position of the fossil locality (star). (c) Sketch map of the Zagora area including the trilobite site (star). [a and b partially modified from Rábano, I., Gutiérrez-Marco, J. C. & García-Bellido, D. C. A remarkable illaenid trilobite from the Middle Ordovician of Morocco. *Bulletin of Geosciences* **89**, 365–374 (2014)]. This figure has been drafted with Corel Draw 12 ([www.corel.com](http://www.corel.com)) and Adobe Photoshop CS3 ([www.adobe.com/CreativeCloud/Photoshop](http://www.adobe.com/CreativeCloud/Photoshop)).

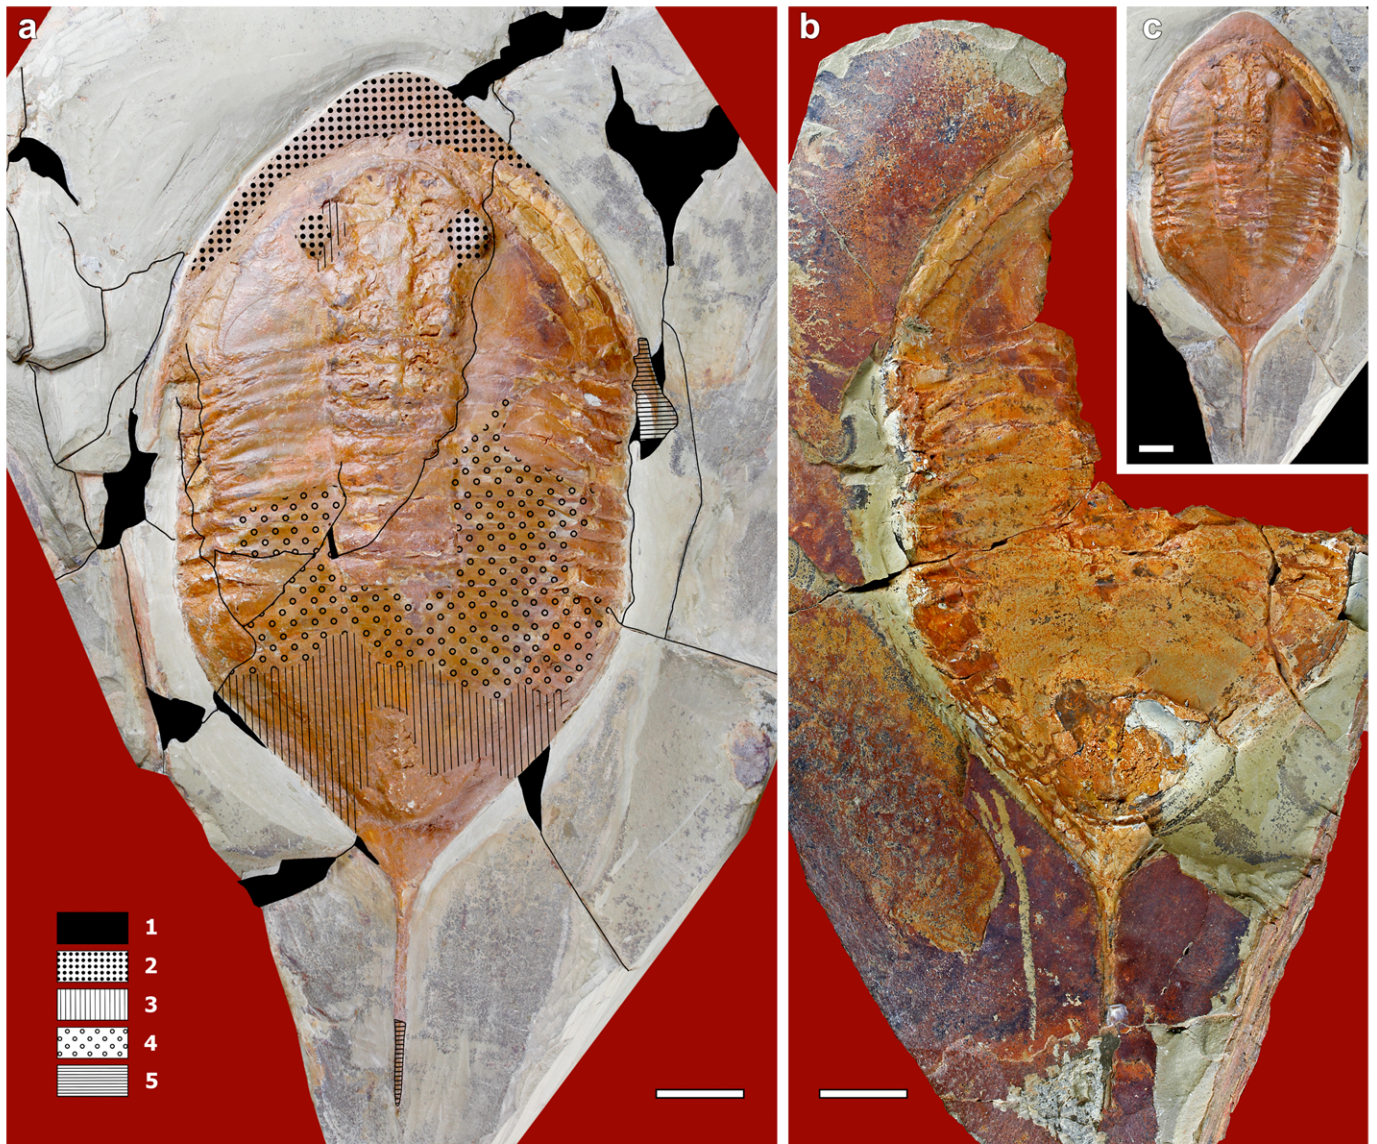

**Supplementary Figure 2. *Megistaspis (Ekeraspis) hammondi* from the late Tremadocian Fezouata Lagerstätte (Moroccan Anti-Atlas).** (a) Convex part of MGM-6755X (reproduced also on Fig. 1a) with indication of the intact parts, as well as those glued and reconstructed by the fossil dealers. (b) Incomplete external mould (concave counterpart) of articulated specimen MGM-6755X. (c) Overview of complete, reconstructed specimen MGM-6755X. Legend: 1, lost parts filled with mix of rock dust and epoxy resin; 2, extensively reconstructed parts, made with coloured epoxy resin; 3, slightly reconstructed parts; 4, polished surfaces of the internal mould; 5, pieces transferred from the external mould. Scale bar, 20 mm.



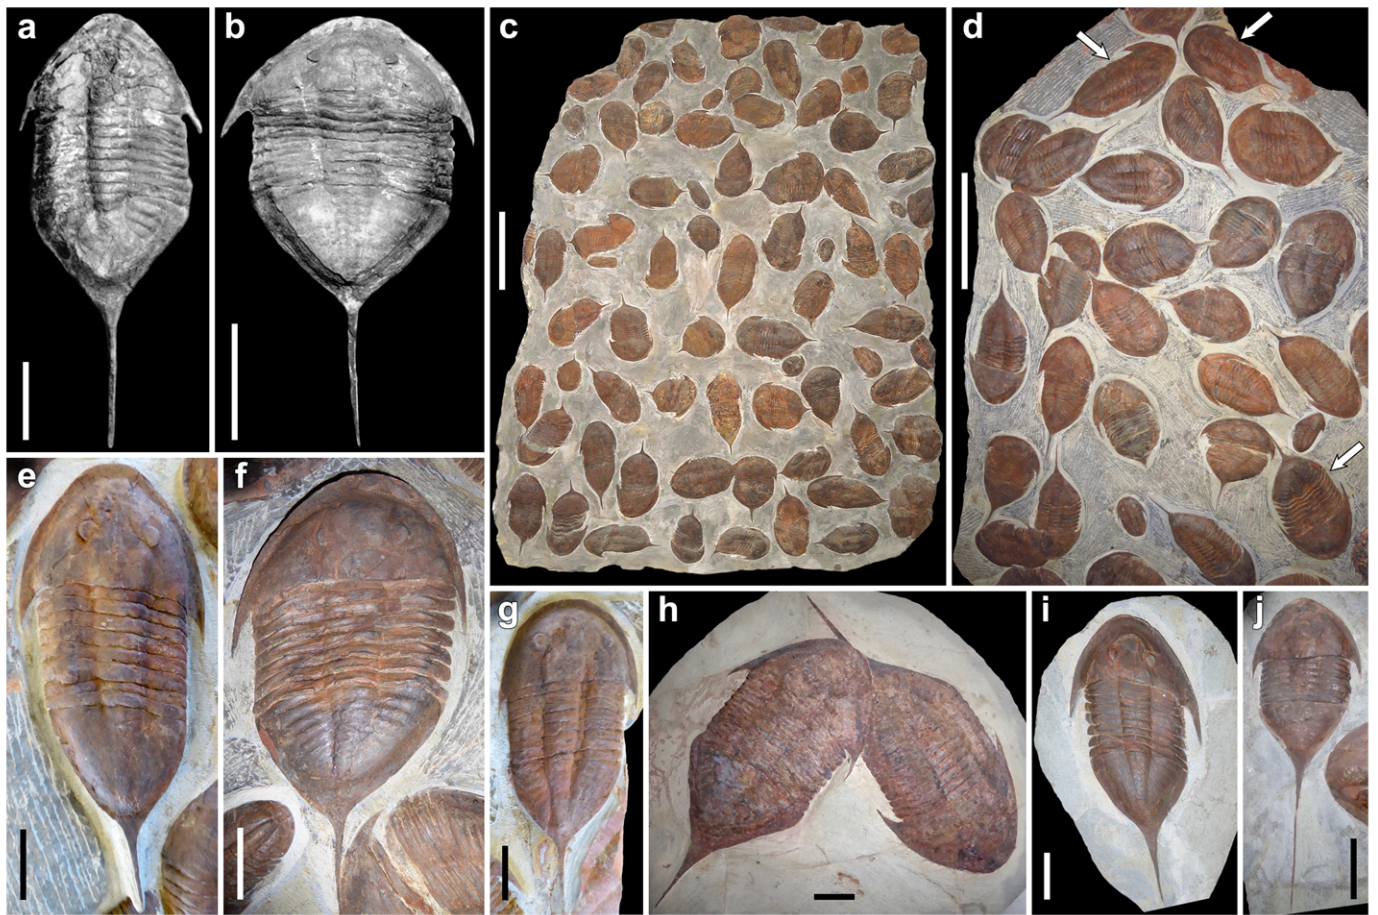

**Supplementary Figure 3. Important samples of *Megistaspis (Ekeraspis) hammondi* from the Lower Ordovician of the Moroccan Anti-Atlas.** These specimens show morphological variations due to crude reconstructions and/or diverse compactional deformations. (a) Holotype specimen of *M. (E.) h. hammondi* (NHM It28344, reproduced from Corbacho & Vela 2010<sup>7</sup>, pl. 4A), with damaged glabella and pygidial rachis. (b) Holotype of *M. (E.) h. fortayi* (NHM It28343, from Corbacho & Vela 2010<sup>7</sup>, pl. 5A), with bent thorax and downward-directed cephalon. (c,d) Two large slabs with aggregation of specimens imitating bedding plane assemblages, for sale in October 2015 at the Kasmi-Achour shop (c) and Tahiri Museum (d) of Erfoud (Morocco). Arrows in d indicate specimens figured in e, f and g. (e–g) Detail of diverse specimens from the large slab in d. (h) Two rather well-preserved specimens belonging to the permanent exhibition on the Tahiri Museum of Erfoud. (i–j) Complete specimens on sale at the Kasmi-Achour fossil shop, showing exaggerated reconstructions of genal and caudal spines, respectively. a,b are housed in the palaeontological collections of the Natural History Museum, London. Scale bar, 50 mm for a,b,e–j; 250 mm for c,d.
